# Supplementary material for: A decade of hospital costs for firearm injuries in the United States by region, 2005–2015: government healthcare costs and firearm policies
Source: HighWire-hosted journal article supplement (doi:10.1136/tsaco-2021-000854), 2022-04-01
Supplement: tsaco-2021-000854supp001_data_supplement.pdf [file tsaco-2021-000854supp001_data_supplement.pdf]

## Supplemental Table 1

| Average Firearm Law Restrictiveness by Region |            |           |                      |
|-----------------------------------------------|------------|-----------|----------------------|
|                                               | Mean Grade | Std. Err. | [95% Conf. Interval] |
| Northeast                                     | 3.555556   | 0.5555556 | 2.439125- 4.671986   |
| Midwest                                       | 2.333333   | 0.3553345 | 1.619262- 3.047405   |
| South                                         | 1.75       | 0.3095696 | 1.127897- 2.372103   |
| West                                          | 2.538462   | 0.4177992 | 1.698863- 3.378061   |

## Supplemental Table 2

```
. ttest Grade, by (ExpandedACA)
```

```
Two-sample t test with equal variances
```

| Group    | Obs | Mean      | Std. Err. | Std. Dev. | [95% Conf. Interval] |           |
|----------|-----|-----------|-----------|-----------|----------------------|-----------|
| 0        | 15  | 1.533333  | .2152887  | .8338094  | 1.071585             | 1.995082  |
| 1        | 35  | 2.8       | .2618615  | 1.549193  | 2.267833             | 3.332167  |
| combined | 50  | 2.42      | .2101312  | 1.485852  | 1.997726             | 2.842274  |
| diff     |     | -1.266667 | .4256958  |           | -2.122585            | -.4107479 |

```
diff = mean(0) - mean(1) t = -2.9755
Ho: diff = 0 degrees of freedom = 48
```

```
Ha: diff < 0 Ha: diff != 0 Ha: diff > 0
Pr(T < t) = 0.0023 Pr(|T| > |t|) = 0.0046 Pr(T > t) = 0.9977
```

```
.
end of do-file
```
